# Supplementary material for: Modality-Dependent Brain Activation Changes Induced by Acquiring a Second Language Abroad
Source: PubMed Central journal article supplement (PMC8032875; doi:10.3389/fnbeh.2021.631957), 2021-03-26
Supplement: Image_1.pdf [file Image_1.pdf]

# **Modality-Dependent Brain Activation Changes Induced by Acquiring a Second Language Abroad**

*Kuniyoshi L. Sakai, Tatsuro Kuwamoto, Satoma Yagi, and Kyohei Matsuya*

*Department of Basic Science, Graduate School of Arts and Sciences, The University of Tokyo, Tokyo, Japan*

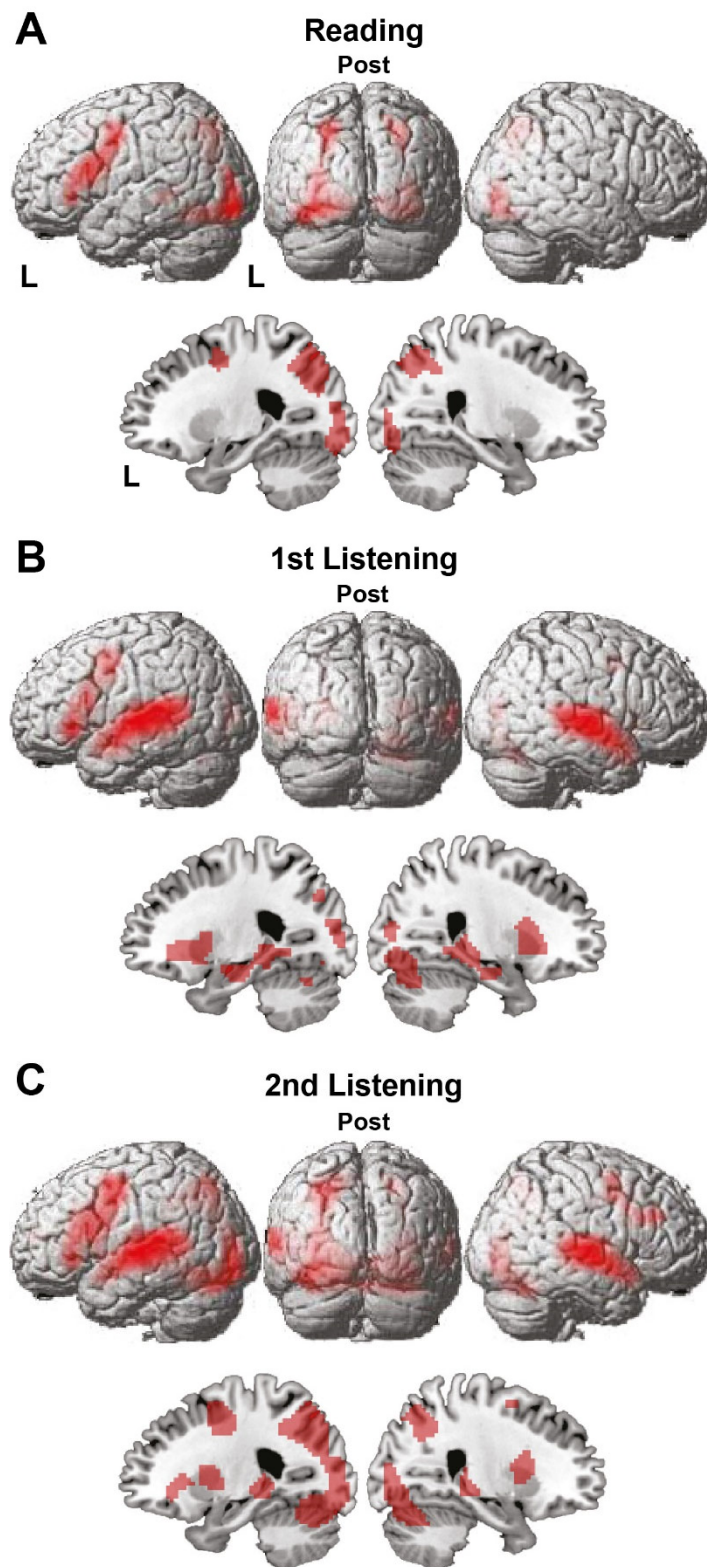

**SUPPLEMENTARY FIGURE 1** | Activation during the presentation of the Post sets, including the individual intervals between the Pre and Post sets as a nuisance factor. **(A)** Reading events, **(B)** first listening events, and **(C)** second listening events. Activations were projected onto the left (L) lateral, back, and right lateral surfaces, as well as onto the parasagittal planes ( $x = \pm 24$ ), of a standard brain.
